# Supplementary material for: Polycomb repressive complex 2 mutations predict survival benefit in advanced cancer patients treated with immune checkpoint inhibitors
Source: PubMed Central journal article supplement — Immunooncol Technol. 2021 Aug 9;10:100035. doi: 10.1016/j.iotech.2021.100035 (PMC9216430; doi:10.1016/j.iotech.2021.100035), 2021-08-09

**Study of origin**

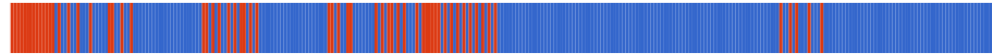

**Profiled for copy number alterations**

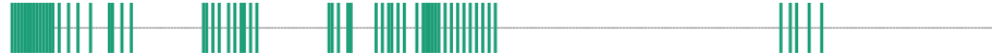

**EZH2**

8%

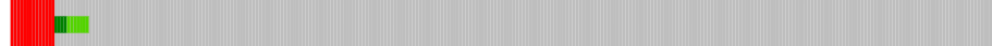

**EZH1**

2.2%

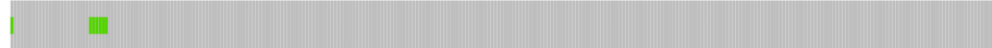

**SUZ12**

2.2%

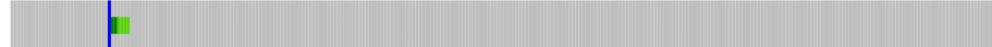

**EED**

2.2%

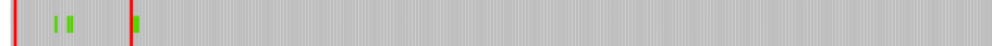

**Genetic Alteration**

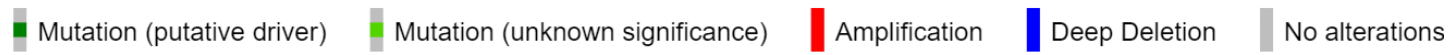

**Study of origin**

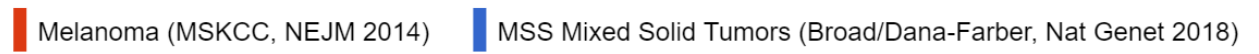

**Profiled for copy number alterations**

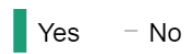

Supplement: mmc1.pdf [file mmc1.pdf]
