# Supplementary material for: Polycomb repressive complex 2 mutations predict survival benefit in advanced cancer patients treated with immune checkpoint inhibitors
Source: PubMed Central journal article supplement — Immunooncol Technol. 2021 Aug 9;10:100035. doi: 10.1016/j.iotech.2021.100035 (PMC9216430; doi:10.1016/j.iotech.2021.100035), 2021-08-09
Supplement: mmc2.pdf [file mmc2.pdf]

Logrank Test P-Value: 0.102

■ Altered group

■ Unaltered group

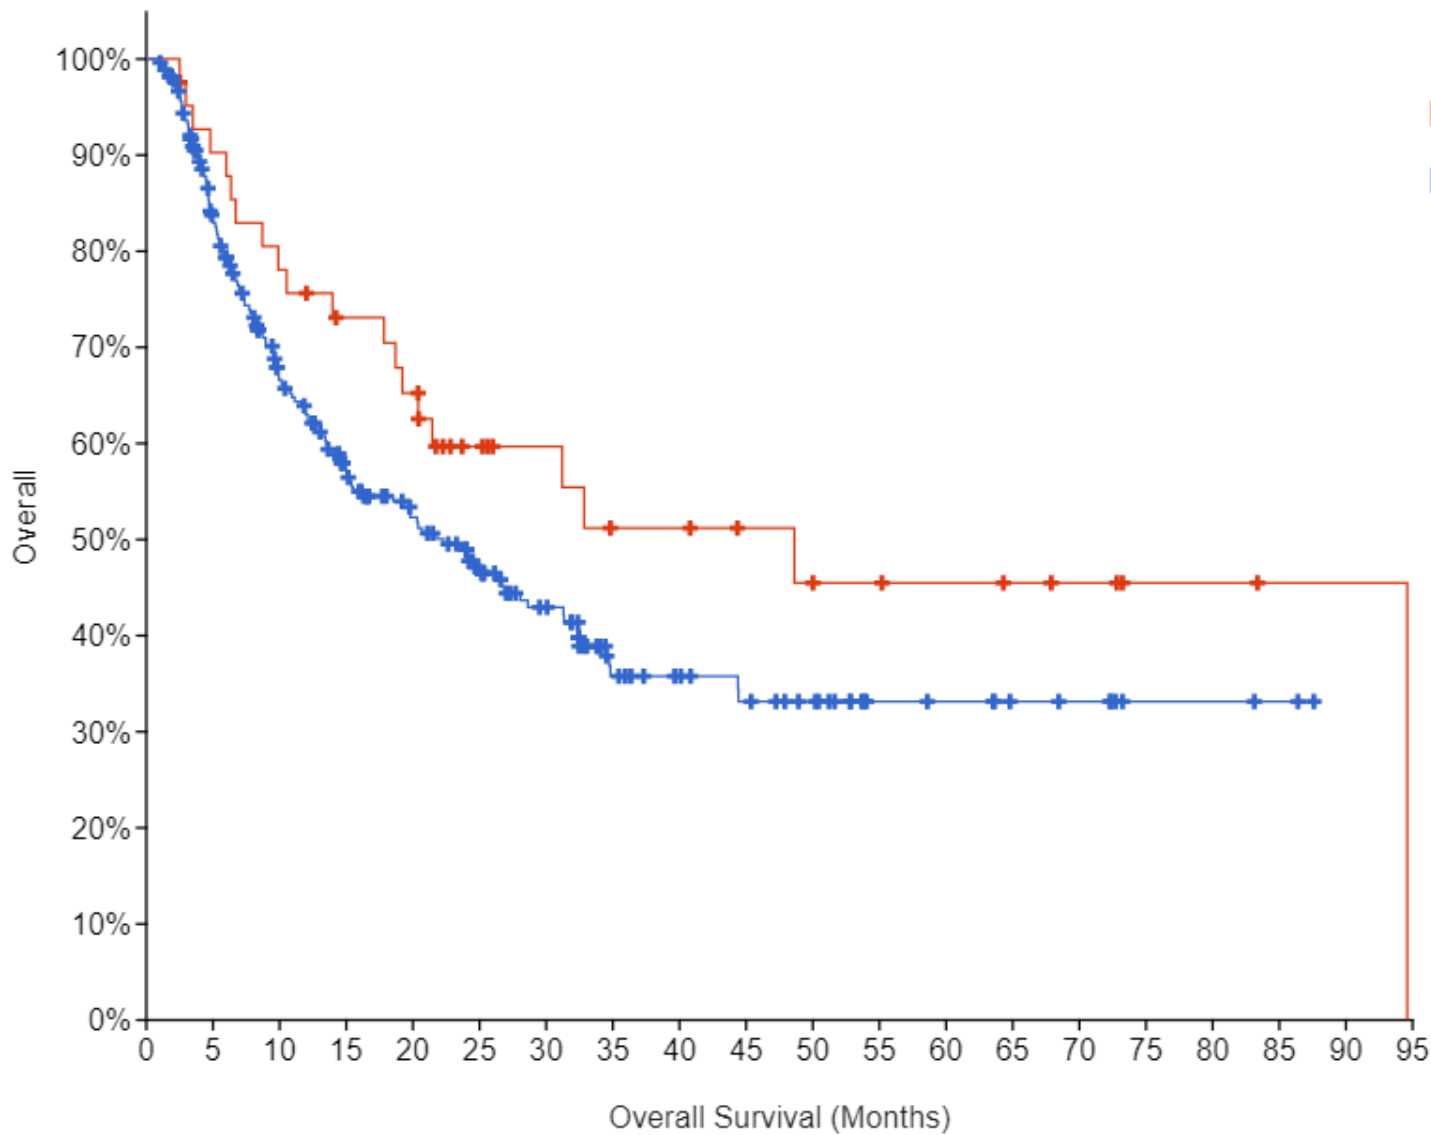

|                 | Number of Cases, Total | Number of Events | Median Months Overall (95% CI) |
|-----------------|------------------------|------------------|--------------------------------|
| Altered group   | <b>41</b>              | <b>20</b>        | <b>48.62 (20.40 - NA)</b>      |
| Unaltered group | <b>272</b>             | <b>138</b>       | <b>22.24 (15.33 - 31.32)</b>   |
