# Supplementary material for: Polycomb repressive complex 2 mutations predict survival benefit in advanced cancer patients treated with immune checkpoint inhibitors
Source: PubMed Central journal article supplement — Immunooncol Technol. 2021 Aug 9;10:100035. doi: 10.1016/j.iotech.2021.100035 (PMC9216430; doi:10.1016/j.iotech.2021.100035), 2021-08-09
Supplement: mmc3.pdf [file mmc3.pdf]

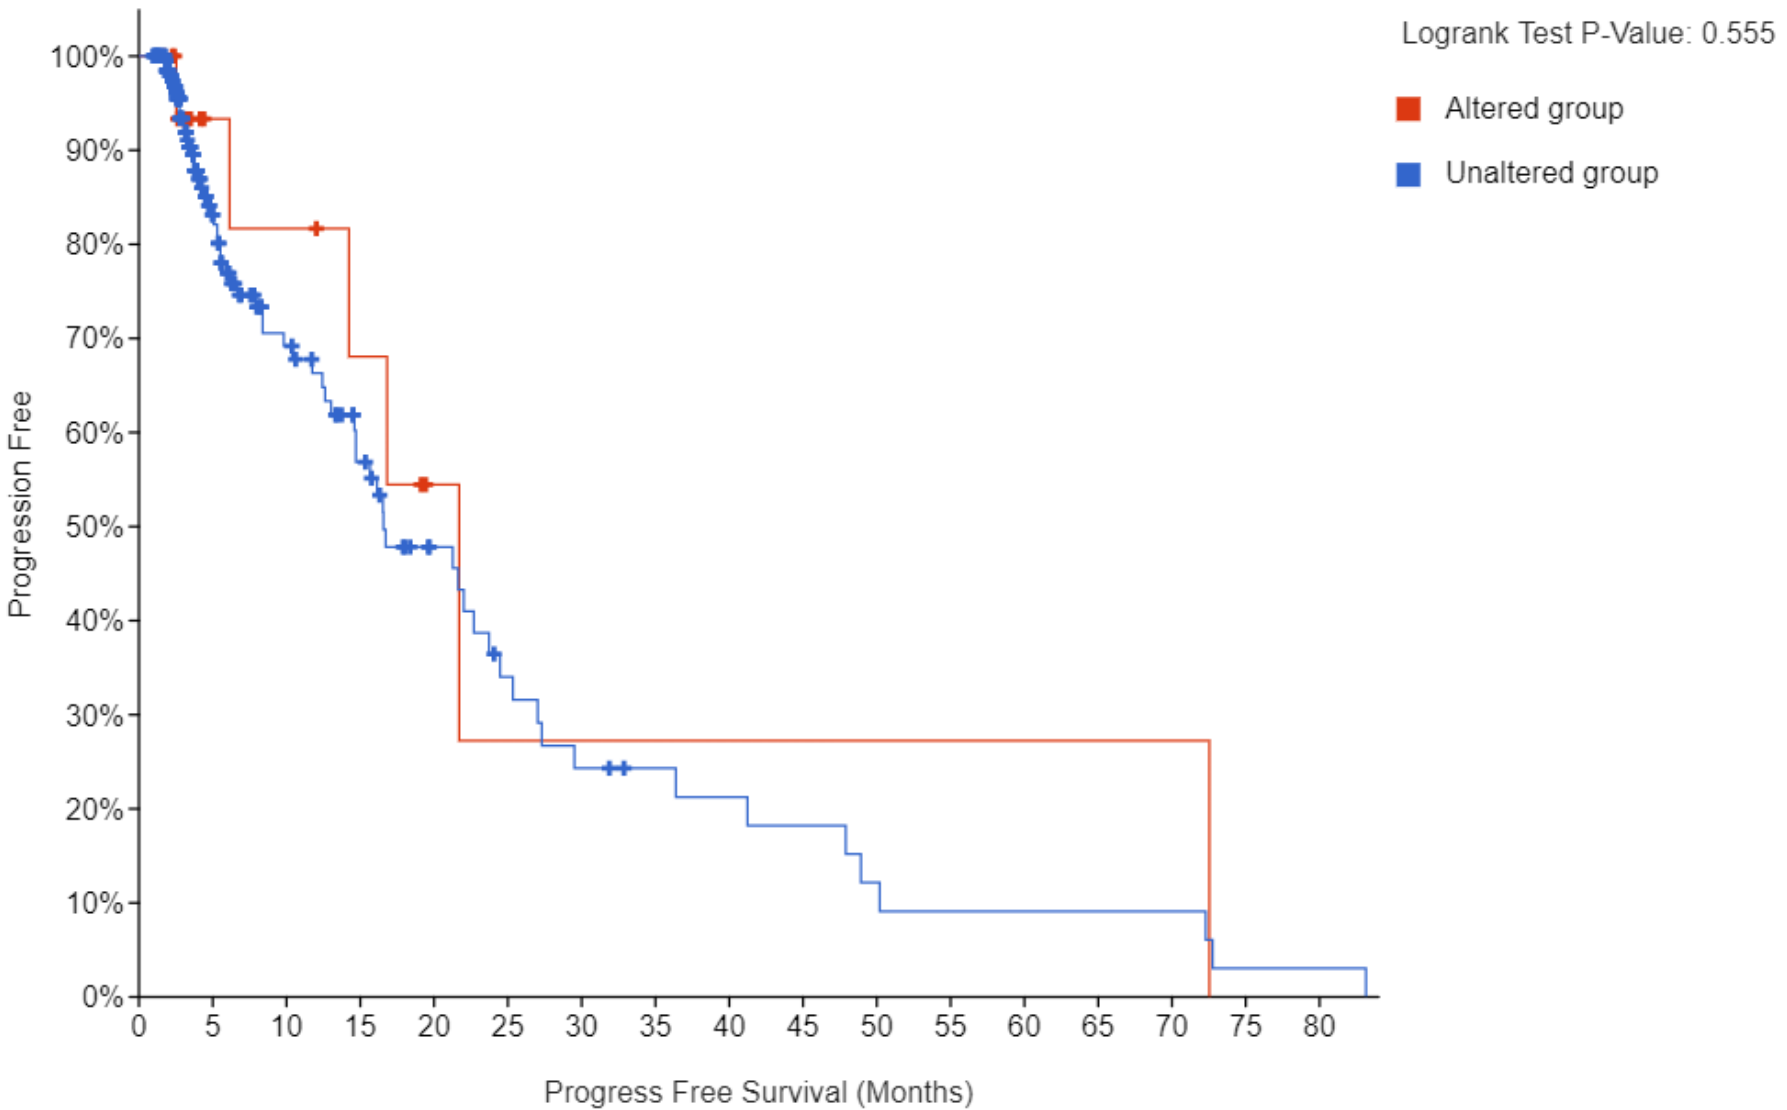

|                 | Number of Cases, Total | Number of Events | Median Months Progression Free (95% CI) |
|-----------------|------------------------|------------------|-----------------------------------------|
| Altered group   | <b>18</b>              | <b>6</b>         | <b>21.71 (14.24 - NA)</b>               |
| Unaltered group | <b>216</b>             | <b>66</b>        | <b>16.58 (14.70 - 24.47)</b>            |
